# Supplementary material for: Comparative genomics of clinical strains of Pseudomonas aeruginosa strains isolated from different geographic sites
Source: PubMed Central journal article supplement (PMC6199293; doi:10.1038/s41598-018-34020-7), 2018-10-23
Supplement: 41598_2018_34020_MOESM1_ESM.pdf [file 41598_2018_34020_MOESM1_ESM.pdf]

## Supplementary information

### **Comparative genomics of clinical strains of *Pseudomonas aeruginosa* strains isolated from different geographic sites**

Dinesh Subedi,<sup>a#</sup> Ajay Kumar Vijay,<sup>a</sup> Gurjeet Singh Kohli,<sup>b</sup> Scott A. Rice,<sup>b,c,d</sup> and Mark Willcox,<sup>a</sup>

<sup>a</sup>School of Optometry and Vision Science, University of New South Wales, Sydney, Australia, <sup>b</sup>The Singapore Centre for Environmental Life Sciences Engineering and <sup>c</sup>The School of Biological Sciences, Nanyang Technological University, Singapore, <sup>d</sup>The ithree Institute, The University of Technology Sydney, Sydney NSW Australia.

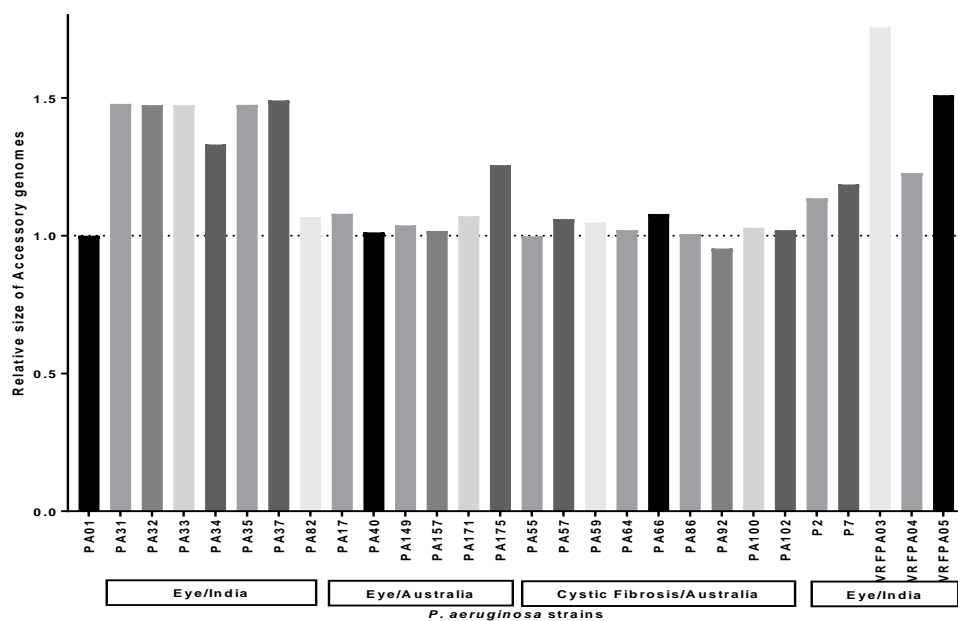

**Supplementary Figure S1:** Size of accessory genomes of 22 strains of this study and five published sequences of Indian *P. aeruginosa* isolates from eye infections relative to PAO1. Dotted line represents size of accessory genome of PAO1. The reference genomes Genbank<sup>®</sup> accession numbers *P. aeruginosa* VRFPA04 (CP008739.2) *P. aeruginosa* VRFPA03 (ATNK00000000.1), *P. aeruginosa* VRFPA05 (AXZJ00000000.1) *P. aeruginosa* P2-L230/9 (JMBS00000000) *P. aeruginosa* P7-L633/96 (JMBS02000000).

**Supplementary Table S1:** Strains of *Pseudomonas aeruginosa* used in the study downloaded from Pseudomonas genome database based on availability of complete genome

| Strain                | Number of Genes | GenBank Accession | Phylogeny group | Isolation Source                    | Core genome SNPs |
|-----------------------|-----------------|-------------------|-----------------|-------------------------------------|------------------|
| PAO1 (Reference)      | 5688            | NC_002516.1       | 1               | Wound                               | 0                |
| UCBPP-PA14            | 5977            | NC_008463.1       | 2               | burn wound                          | 28500            |
| PA7                   | 6369            | NC_009656.1       | 1               | non-respiratory clinical isolate    | 176550           |
| LESB58                | 6028            | NC_011770.1       | 1               | sputum                              | 13325            |
| VA-134                | 5804            | CP013245.1        | 1               | skin wound of burn human patient    | 13663            |
| X78812                | 5782            | CP008872.2        | 1               | missing                             | 13872            |
| F9670                 | 5987            | CP008873.1        | 1               | missing                             | 13722            |
| F22031                | 6077            | CP007399.1        | 1               | pubic bone                          | 13687            |
| NCTC10332             | 5704            | LN831024.1        | 1               | not known                           | 13685            |
| 12-4-4(59)            | 5876            | CP013696.1        | 1               | Blood culture of burn human patient | 13411            |
| DSM50071              | 5803            | CP012001.1        | 1               | missing                             | 13681            |
| S86968                | 6360            | CP008865.2        | 1               | missing                             | 13657            |
| T38079                | 6137            | CP008866.2        | 1               | missing                             | 13658            |
| T52373                | 5643            | CP008867.1        | 1               | missing                             | 13708            |
| T63266                | 5880            | CP008868.1        | 1               | missing                             | 13731            |
| W16407                | 6181            | CP008869.2        | 1               | missing                             | 11626            |
| W36662                | 6237            | CP008870.2        | 1               | missing                             | 13698            |
| W45909                | 6225            | CP008871.2        | 1               | missing                             | 13364            |
| W60856                | 6333            | CP008864.2        | 1               | missing                             | 13232            |
| F23197                | 5905            | CP008856.2        | 1               | missing                             | 14694            |
| F30658                | 6622            | CP008857.1        | 1               | missing                             | 14147            |
| H5708                 | 5804            | CP008859.2        | 1               | missing                             | 14287            |
| H27930                | 5964            | CP008860.2        | 1               | missing                             | 13418            |
| H47921                | 6249            | CP008861.1        | 1               | missing                             | 18295            |
| M1608                 | 5887            | CP008862.2        | 2               | missing                             | 27703            |
| M37351                | 6322            | CP008863.1        | 2               | missing                             | 27702            |
| USDA-ARS-USMARC-41639 | 5814            | CP013989.1        | 1               | nasopharynx                         | 13740            |
| NCGM1984              | 6399            | AP014646.1        | 2               | catheter                            | 27399            |
| NCGM1900              | 6354            | AP014622.1        | 2               | catheter                            | 27399            |
| FRD1                  | 6179            | CP010555.1        | 1               | sputum                              | 14145            |
| Carb01 63             | 7070            | CP011317.1        | 1               | environment                         | 15254            |
| DHS01                 | 6608            | CP013993.1        | 1               | nose                                | 13536            |
| NCGM257               | 6628            | AP014651.1        | 2               | Midstream urine                     | 28392            |
| 8380                  | 6086            | AP014839.2        | 1               | environment                         | 13960            |
| IOMTU 133             | 6276            | AP017302.1        | 2               | Urinary catheter                    | 28311            |
| PACS2                 | 5989            | AAQW01000001.1    | 1               | missing                             | 14351            |
| F9676                 | 5827            | CP012066.1        | 1               | environment                         | 13151            |
| PA1088                | 6196            | CP015001.1        | 1               | urine                               | 13860            |
| 213BR                 | 6169            | AFXK01000001.1    | 1               | missing                             | 13866            |
| NHmuc                 | 5795            | CP013479.1        | 1               | missing                             | 13484            |
| 19BR                  | 6189            | AFXJ01000001.1    | 1               | missing                             | 13867            |
| PA1RG                 | 5994            | CP012679.1        | 1               | hospital sewage                     | 15635            |
| F63912                | 6149            | CP008873.1        | 1               | missing                             | 13747            |
| N17-1                 | 5867            | CP014948.1        | 1               | soil                                | 13451            |
| PAER4_119             | 6083            | CP013113.1        | 1               | Lindberg collection                 | 13806            |
| ATCC 27853            | 6312            | CP015117.1        | 1               | missing                             | 13649            |
| BAMCPA07-48           | 6438            | CP015377.1        | 2               | combat injury wound                 | 27990            |
| PA121617              | 6303            | CP016215.1        | 1               | sputum                              | 13407            |
| PA_154197             | 6041            | CP017306.1        | 1               | missing                             | 12908            |
| PA_D1                 | 6069            | CP012585.1        | 2               | sputum                              | 27830            |
| PA_D2                 | 6066            | CP012578.1        | 2               | sputum                              | 27833            |
| PA_D9                 | 6065            | CP012580.1        | 2               | sputum                              | 27830            |
| PA_D16                | 6086            | CP012581.1        | 2               | sputum                              | 27831            |
| PA_D22                | 6091            | CP012583.1        | 2               | sputum                              | 27831            |
| SCVJan                | 5794            | CP013478.1        | 1               | murine model                        | 13483            |
| PA_D25                | 6080            | CP012584.1        | 2               | sputum                              | 27843            |
| PA_D5                 | 6087            | CP012579.1        | 2               | sputum                              | 27830            |
| PA_D21                | 6063            | CP012582.1        | 2               | sputum                              | 27834            |
| ATCC 15692            | 5744            | CP017149.1        | 1               | Infected wound                      | 14               |
| FA-HZ1                | 6147            | CP017353.1        | 1               | wastewater                          | 13349            |
| M18                   | 5770            | CP002496.1        | 1               | missing                             | 12888            |
| NCGM2.S1              | 6274            | AP012280.1        | 2               | missing                             | 27404            |
| PA14Or_reads          | 5971            | LT608330.1        | 2               | missing                             | 28430            |
| PcyII-10              | 5847            | LT673656.1        | 1               | missing                             | 13188            |
| DK2                   | 5959            | CP003149.1        | 1               | sputum                              | 14269            |
| B136-33               | 5904            | CP004061.1        | 2               | diarrhea                            | 27981            |
| RP73                  | 5864            | CP006245.1        | 1               | missing                             | 13795            |

| <b>Strain</b>     | <b>Number of Genes</b> | <b>GenBank Accession</b> | <b>Phylogeny group</b> | <b>Isolation Source</b> | <b>Core genome SNPs</b> |
|-------------------|------------------------|--------------------------|------------------------|-------------------------|-------------------------|
| <b>YL84</b>       | 5908                   | CP007147.1               | 1                      | compost                 | 13980                   |
| <b>DN1</b>        | 6626                   | CP017099.1               | 2                      | soil                    | 27667                   |
| <b>MTB-1</b>      | 6186                   | CP006853.1               | 2                      | t-HCH contaminated soil | 28100                   |
| <b>SCV20265</b>   | 6380                   | CP006931.1               | 1                      | lung                    | 13980                   |
| <b>VRFPA04</b>    | 6308                   | CP008739.2               | 2                      | corneal button          | 27727                   |
| <b>SCVFeb</b>     | 5794                   | CP013477.1               | 1                      | murine model            | 13483                   |
| <b>LES431</b>     | 6091                   | CP006937.1               | 1                      | missing                 | 13335                   |
| <b>PA11803</b>    | 6565                   | CP015003.1               | 1                      | bloodstream             | 13874                   |
| <b>PA01_Orsay</b> | 5757                   | LN871187.1               | 1                      | missing                 | 13                      |
| <b>PA8281</b>     | 6408                   | CP015002.1               | 1                      | tracheal aspirate       | 13873                   |
| <b>PA1R</b>       | 5689                   | CP004055.1               | 1                      | missing                 | 15639                   |
| <b>PA1</b>        | 5987                   | CP004054.2               | 1                      | missing                 | 15636                   |
| <b>PA7790</b>     | 6577                   | CP015000.1               | 1                      | tracheal aspirate       | 13875                   |
| <b>B10W</b>       | 6317                   | CP017969.1               | 2                      | wastewater              | 27524                   |
| <b>Ocean_1155</b> | 6481                   | CP022526.1               | 2                      | Ocean                   | 27659                   |

**Supplementary Table S2:** Single Nucleotide Polymorphisms (SNPs) observed in core genome of 22 strains of *P. aeruginosa*

| <i>P. aeruginosa</i> strains | Core genome SNPs (reference to PAO1) |
|------------------------------|--------------------------------------|
| <b>PA31</b>                  | 27547                                |
| <b>PA32</b>                  | 27607                                |
| <b>PA33</b>                  | 27607                                |
| <b>PA34</b>                  | 28502                                |
| <b>PA35</b>                  | 27608                                |
| <b>PA37</b>                  | 27609                                |
| <b>PA82</b>                  | 27990                                |
| <b>PA17</b>                  | 13484                                |
| <b>PA40</b>                  | 14442                                |
| <b>PA149</b>                 | 13898                                |
| <b>PA157</b>                 | 14248                                |
| <b>PA171</b>                 | 13345                                |
| <b>PA175</b>                 | 27411                                |
| <b>PA55</b>                  | 14                                   |
| <b>PA57</b>                  | 46459                                |
| <b>PA59</b>                  | 13844                                |
| <b>PA64</b>                  | 14133                                |
| <b>PA66</b>                  | 13856                                |
| <b>PA86</b>                  | 13851                                |
| <b>PA92</b>                  | 14129                                |
| <b>PA100</b>                 | 15067                                |
| <b>PA102</b>                 | 13381                                |

**Supplementary Table S3:** List of resistome and associated functions

| <b>Locus tag<br/>(PA01)</b> | <b>Gene</b>  | <b>Product/Function</b>                                                                           |
|-----------------------------|--------------|---------------------------------------------------------------------------------------------------|
| <b>PA0004</b>               | <i>gyrB</i>  | DNA gyrase subunit B                                                                              |
| <b>PA0156</b>               | <i>triA</i>  | Resistance-Nodulation-Cell Division (RND) triclosan efflux membrane fusion protein, TriA          |
| <b>PA0157</b>               | <i>triB</i>  | Resistance-Nodulation-Cell Division (RND) triclosan efflux membrane fusion protein, TriB          |
| <b>PA0158</b>               | <i>triC</i>  | Resistance-Nodulation-Cell Division (RND) triclosan efflux transporter, TriC                      |
| <b>PA0424</b>               | <i>mexR</i>  | multidrug resistance operon repressor                                                             |
| <b>PA0425</b>               | <i>mexA</i>  | Resistance-Nodulation-Cell Division (RND) multidrug efflux membrane fusion protein MexA precursor |
| <b>PA0426</b>               | <i>mexB</i>  | Resistance-Nodulation-Cell Division (RND) multidrug efflux transporter MexB                       |
| <b>PA0427</b>               | <i>oprM</i>  | Major intrinsic multiple antibiotic resistance efflux outer membrane protein OprM precursor       |
| <b>PA0706</b>               | <i>catB7</i> | chloramphenicol acetyltransferase                                                                 |
| <b>PA0903</b>               | <i>alaS</i>  | alanyl-tRNA synthetase                                                                            |
| <b>PA0920</b>               | <i>mprF</i>  | alanyl-phosphatidylglycerol synthase                                                              |
| <b>PA1129</b>               | <i>fosA</i>  | fosfomycin resistance protein, FosA                                                               |
| <b>PA1236</b>               | <i>farB</i>  | probable major facilitator superfamily (MFS) transporter                                          |
| <b>PA1282</b>               | <i>lrfA</i>  | probable major facilitator superfamily (MFS) transporter                                          |
| <b>PA1316</b>               | <i>lrfA</i>  | probable major facilitator superfamily (MFS) transporter                                          |
| <b>PA1435</b>               | <i>mexM</i>  | probable Resistance-Nodulation-Cell Division (RND) efflux membrane fusion protein precursor       |
| <b>PA1436</b>               | <i>mdtC</i>  | probable Resistance-Nodulation-Cell Division (RND) efflux transporter                             |
| <b>PA1754</b>               | <i>cysB</i>  | transcriptional regulator CysB                                                                    |
| <b>PA1972</b>               | <i>pmrC</i>  | conserved hypothetical protein                                                                    |
| <b>PA2018</b>               | <i>mexY</i>  | Resistance-Nodulation-Cell Division (RND) multidrug efflux transporter MexY                       |
| <b>PA2019</b>               | <i>mexX</i>  | Resistance-Nodulation-Cell Division (RND) multidrug efflux membrane fusion protein MexX precursor |
| <b>PA2389</b>               | <i>macA</i>  | Membrane fusion protein that forms an antibiotic efflux complex with MacB and TolC.               |
| <b>PA2390</b>               | <i>macB</i>  | ATP-binding cassette (ABC) transporter                                                            |
| <b>PA2391</b>               | <i>opmQ</i>  | probable outer membrane protein precursor                                                         |
| <b>PA2491</b>               | <i>mexS</i>  | suppressor of MexT                                                                                |
| <b>PA2493</b>               | <i>mexE</i>  | Resistance-Nodulation-Cell Division (RND) multidrug efflux membrane fusion protein MexE precursor |
| <b>PA2494</b>               | <i>mexF</i>  | Resistance-Nodulation-Cell Division (RND) multidrug efflux transporter MexF                       |
| <b>PA2495</b>               | <i>oprN</i>  | Multidrug efflux outer membrane protein OprN precursor                                            |
| <b>PA2525</b>               | <i>adeC</i>  | outer membrane factor of the AdeABC multidrug efflux complex                                      |

| <b>Locus tag</b><br><b>(PAO1)</b> | <b>Gene</b>        | <b>Product/Function</b>                                                                                               |
|-----------------------------------|--------------------|-----------------------------------------------------------------------------------------------------------------------|
| <b>PA2526</b>                     | <i>muxC</i>        | transporter that forms a heteromultimer complex with MdtB to form a multidrug transporter                             |
| <b>PA2527</b>                     | <i>muxB</i>        | transporter that forms a heteromultimer complex with MdtB to form a multidrug transporter                             |
| <b>PA2837</b>                     | <i>opmA</i>        | probable outer membrane protein precursor                                                                             |
| <b>PA3002</b>                     | <i>mfd</i>         | transcription-repair coupling protein Mfd                                                                             |
| <b>PA3019</b>                     | <i>taeA</i>        | probable ATP-binding component of ABC transporter                                                                     |
| <b>PA3137</b>                     | <i>farB</i>        | probable major facilitator superfamily (MFS) transporter                                                              |
| <b>PA3168</b>                     | <i>gyrA</i>        | DNA gyrase subunit A                                                                                                  |
| <b>PA3521</b>                     | <i>opmE</i>        | outer membrane factor protein that is part of the multidrug efflux pump MexPQ-OpmE                                    |
| <b>PA3522</b>                     | <i>mexQ</i>        | inner membrane transporter of the AdeFGH multidrug efflux complex                                                     |
| <b>PA3523</b>                     | <i>mexP</i>        | membrane fusion protein of the MexPQ-OpmE multidrug efflux complex                                                    |
| <b>PA3553</b>                     | <i>PmrF</i>        | required for the synthesis and transfer of 4-amino-4-deoxy-L-arabinose (Ara4N) to Lipid A for resistance to polymyxin |
| <b>PA3554</b>                     | <i>arnA</i>        | modifies lipid A with 4-amino-4-deoxy-L-arabinose (Ara4N)                                                             |
| <b>PA3574</b>                     | <i>nalD</i>        | repressor of MexAB-OprM                                                                                               |
| <b>PA3676</b>                     | <i>mexK</i>        | inner membrane resistance-nodulation-cell division (RND) transporter in the MexJK multidrug efflux protein            |
| <b>PA3677</b>                     | <i>mexJ</i>        | membrane fusion protein of the MexJK multidrug efflux protein                                                         |
| <b>PA3678</b>                     | <i>mexL</i>        | specific repressor of mexJK transcription and autoregulates its own expression                                        |
| <b>PA3894</b>                     | <i>adeC</i>        | probable outer membrane protein precursor                                                                             |
| <b>PA3946</b>                     | <i>rosC</i>        | two-component sensor RocS1                                                                                            |
| <b>PA4109</b>                     | <i>ampR</i>        | Transcriptional Regulator                                                                                             |
| <b>PA4110</b>                     | <i>ampC</i>        | beta-lactamase precursor                                                                                              |
| <b>PA4119</b>                     | <i>APH(3')-IIb</i> | aminoglycoside 3'-phosphotransferase type IIb                                                                         |
| <b>PA4205</b>                     | <i>mexG</i>        | hypothetical protein                                                                                                  |
| <b>PA4206</b>                     | <i>mexH</i>        | probable Resistance-Nodulation-Cell Division (RND) efflux membrane fusion protein precursor                           |
| <b>PA4207</b>                     | <i>mexI</i>        | probable Resistance-Nodulation-Cell Division (RND) efflux transporter                                                 |
| <b>PA4208</b>                     | <i>opmD</i>        | probable outer membrane protein precursor                                                                             |
| <b>PA4265</b>                     | <i>tufA</i>        | elongation factor Tu                                                                                                  |
| <b>PA4277</b>                     | <i>tufB</i>        | elongation factor Tu                                                                                                  |
| <b>PA4374</b>                     | <i>mexV</i>        | Resistance-Nodulation-Cell Division (RND) multidrug efflux membrane fusion protein MexV                               |
| <b>PA4375</b>                     | <i>mexW</i>        | Resistance-Nodulation-Cell Division (RND) multidrug efflux transporter MexW                                           |
| <b>PA4560</b>                     | <i>ileS</i>        | isoleucyl-tRNA synthetase                                                                                             |
| <b>PA4595</b>                     | <i>yjjk</i>        | probable ATP-binding component of ABC transporter                                                                     |
| <b>PA4597</b>                     | <i>oprJ</i>        | Multidrug efflux outer membrane protein OprJ precursor                                                                |

| <b>Locus tag<br/>(PAO1)</b> | <b>Gene</b>   | <b>Product/Function</b>                                                                           |
|-----------------------------|---------------|---------------------------------------------------------------------------------------------------|
| <b>PA4598</b>               | <i>mexD</i>   | Resistance-Nodulation-Cell Division (RND) multidrug efflux transporter MexD                       |
| <b>PA4599</b>               | <i>mexC</i>   | Resistance-Nodulation-Cell Division (RND) multidrug efflux membrane fusion protein MexC precursor |
| <b>PA4600</b>               | <i>nfxB</i>   | transcriptional regulator NfxB                                                                    |
| <b>PA4964</b>               | <i>parC</i>   | topoisomerase IV subunit A                                                                        |
| <b>PA4967</b>               | <i>parE</i>   | topoisomerase IV subunit B                                                                        |
| <b>PA4974</b>               | <i>opmH</i>   | probable outer membrane protein precursor                                                         |
| <b>PA4990</b>               | <i>emrE</i>   | SMR multidrug efflux transporter                                                                  |
| <b>PA4997</b>               | <i>msbA</i>   | transport protein MsbA                                                                            |
| <b>PA5158</b>               | <i>adeC</i>   | probable outer membrane protein precursor                                                         |
| <b>PA5160</b>               | <i>farB</i>   | drug efflux transporter                                                                           |
| <b>PA5514</b>               | <i>OXA-50</i> | probable beta-lactamase                                                                           |
| <b>PA5518</b>               | <i>rosB</i>   | probable potassium efflux transporter                                                             |



**Supplementary Table S4:** List of virulence genes used in the study

| <b>Virulence genes</b> | <b>Functions</b>                                                            |
|------------------------|-----------------------------------------------------------------------------|
| <i>alg44</i>           | Type 4 fimbrial precursor                                                   |
| <i>alg8</i>            | Alginate biosynthesis protein                                               |
| <i>algA</i>            | Alginate-c5-mannuronan-epimerase                                            |
| <i>algB</i>            | Phosphomannose isomerase/guanosine 5'-diphospho-D-mannose pyrophosphorylase |
| <i>algC</i>            | Two-component response regulator                                            |
| <i>algD</i>            | Phosphomannomutase                                                          |
| <i>algE</i>            | GDP-mannose 6-dehydrogenase                                                 |
| <i>algF</i>            | Alginate biosynthetic protein AlgK precursor                                |
| <i>algG</i>            | Alginate o-acetyltransferase                                                |
| <i>algI</i>            | Outer membrane protein                                                      |
| <i>algJ</i>            | Alginate o-acetyltransferase                                                |
| <i>algK</i>            | Alginate o-acetyltransferase                                                |
| <i>algL</i>            | Alginate biosynthesis protein                                               |
| <i>algP/algR3</i>      | Poly(beta-d-mannuronate) lyase precursor                                    |
| <i>algQ</i>            | Alginate regulatory protein                                                 |
| <i>algR</i>            | Alginate regulatory protein                                                 |
| <i>algU</i>            | Alginate biosynthesis regulatory protein                                    |
| <i>algW</i>            | Alginate biosynthesis protein                                               |
| <i>algX</i>            | AlgW protein [Alginate regulation (CVF523)]                                 |
| <i>algZ</i>            | Alginate biosynthesis protein                                               |
| <i>aprA</i>            | Sigma factor                                                                |
| <i>aprA</i>            | Sigma factor                                                                |
| <i>exoS</i>            | Hypothetical protein                                                        |
| <i>exoT</i>            | Type III secretion system effector                                          |
| <i>exoU*</i>           | Type III secretion system effector                                          |
| <i>exoY</i>            | Type III secretion system effector                                          |
| <i>exsA</i>            | Type III secretion system effector                                          |
| <i>exsB</i>            | Type III secretion system regulatory protein                                |
| <i>exsC</i>            | Type III secretion system pilotin                                           |
| <i>exsD</i>            | Type III secretion system regulatory protein                                |
| <i>exsE</i>            | Type III secretion system regulatory protein                                |
| <i>fleI/flag</i>       | FimX [type IV pili (AI097)]                                                 |
| <i>fleN</i>            | Flagellar protein FlaG [Deoxyhexose linking sugar]                          |
| <i>fleP</i>            | Flagellar synthesis regulator                                               |
| <i>fleQ</i>            | Flagellar protein                                                           |
| <i>fleR</i>            | Transcriptional regulatore                                                  |
| <i>fleS</i>            | Two-component response regulator                                            |
| <i>flgA</i>            | Two-component sensor [Deoxyhexose linking sugar, 209 linking sugar, island] |
| <i>flgB</i>            | Flagellar basal body P-ring biosynthesis protein linking Da                 |
| <i>flgC</i>            | Flagellar basal body rod protein                                            |

| <b>Virulence genes</b> | <b>Functions</b>                                                    |
|------------------------|---------------------------------------------------------------------|
| <i>flgD</i>            | Flagellar basal-body rod protein                                    |
| <i>flgE</i>            | Flagellar basal-body rod modification protein                       |
| <i>flgF</i>            | Flagellar hook protein                                              |
| <i>flgG</i>            | Flagellar basal-body rod protein                                    |
| <i>flgH</i>            | Flagellar basal-body rod protein                                    |
| <i>flgI</i>            | Flagellar L-ring protein precursor                                  |
| <i>flgJ</i>            | Flagellar P-ring protein precursor                                  |
| <i>flgK</i>            | Flagellar rod assembly protein/muramidase                           |
| <i>flgL</i>            | Flagellar hook-associated protein 1                                 |
| <i>flgM</i>            | Flagellar hook-associated protein 3                                 |
| <i>flgN</i>            | Negative regulator of flagellin synthesis                           |
| <i>flhA</i>            | Flagella synthesis protein                                          |
| <i>flhB</i>            | Flagellar biosynthesis protein                                      |
| <i>flhF</i>            | Flagellar biosynthetic protein                                      |
| <i>fliA</i>            | Flagellar biosynthesis protein                                      |
| <i>fliC</i>            | Flagellar biosynthesis sigma factor                                 |
| <i>fliD</i>            | B-type flagellin                                                    |
| <i>fliE</i>            | Flagellar capping protein                                           |
| <i>fliF</i>            | Flagellar hook-basal body complex protein                           |
| <i>fliG</i>            | Flagellar M-ring protein                                            |
| <i>fliH</i>            | Flagellar motor switch protein G                                    |
| <i>fliI</i>            | Flagellar assembly protein H                                        |
| <i>fliJ</i>            | Flagellum-specific ATP synthase                                     |
| <i>fliK</i>            | Flagellar protein                                                   |
| <i>fliL</i>            | Flagellar hook-length control protein                               |
| <i>fliM</i>            | Flagellar basal body protein                                        |
| <i>fliN</i>            | Flagellar motor switch protein                                      |
| <i>fliO</i>            | Flagellar motor switch protein                                      |
| <i>fliP</i>            | Flagellar protein                                                   |
| <i>fliQ</i>            | Flagellar biosynthetic protein                                      |
| <i>fliR</i>            | Flagellar biosynthetic protein                                      |
| <i>fliS</i>            | Flagellar biosynthetic protein                                      |
| <i>fliT</i>            | Flagellar biosynthetic protein                                      |
| <i>gacA</i>            | Response regulator                                                  |
| <i>gacS</i>            | Sensor/response regulator hybrid                                    |
| <i>hdtS</i>            | Hypothetical protein                                                |
| <i>lasA</i>            | Hypothetical protein                                                |
| <i>lasB</i>            | LasA protease precursor                                             |
| <i>lasI</i>            | Elastase                                                            |
| <i>lasR</i>            | Autoinducer synthesis protein                                       |
| <i>lepA</i>            | <i>Pseudomonas aeruginosa</i> -derived large extracellular protease |

| <b>Virulence genes</b> | <b>Functions</b>                                                                                                          |
|------------------------|---------------------------------------------------------------------------------------------------------------------------|
| <i>motA</i>            | MbtH-like protein from the pyoverdine cluster                                                                             |
| <i>motB</i>            | Flagellar motor protein                                                                                                   |
| <i>motC</i>            | Flagellar motor protein                                                                                                   |
| <i>motD</i>            | Flagellar motor protein                                                                                                   |
| <i>motY</i>            | Flagellar motor protein                                                                                                   |
| <i>mucA</i>            | Probable outer membrane protein precursor                                                                                 |
| <i>mucB</i>            | Alkaline metalloproteinase precursor                                                                                      |
| <i>mucC</i>            | Anti-sigma factor MucA, inhibitor of alg gene activity                                                                    |
| <i>mucD</i>            | Negative regulator for alginate biosynthesis                                                                              |
| <i>mucE</i>            | Serine protease MucD precursor                                                                                            |
| <i>mucP</i>            | Small envelope protein                                                                                                    |
| <i>mvfR</i>            | Transcriptional regulator                                                                                                 |
| <i>ndVB</i>            | Required for the synthesis of periplasmic glucans, and involved in biofilm-specific resistance to a subset of antibiotics |
| <i>pasP</i>            | Small protease                                                                                                            |
| <i>pcr1</i>            | Transcriptional regulator                                                                                                 |
| <i>pcr2</i>            | Type III secretion system protein                                                                                         |
| <i>pcr3</i>            | Type III secretion system protein                                                                                         |
| <i>pcr4</i>            | Type III secretion system protein                                                                                         |
| <i>pcrD</i>            | Type III secretion system protein                                                                                         |
| <i>pcrG</i>            | Type III secretion system protein                                                                                         |
| <i>pcrH</i>            | Type III secretion system cytoplasmic regulator                                                                           |
| <i>pcrR</i>            | Type III secretion system regulatory protein                                                                              |
| <i>pcrV</i>            | Type III secretion system regulatory protein                                                                              |
| <i>phnA</i>            | Anthranilate synthase component I                                                                                         |
| <i>phnB</i>            | Anthranilate synthase component II                                                                                        |
| <i>phzM</i>            | Phenazine-modifying enzyme                                                                                                |
| <i>phzS</i>            | Phenazine-specific methyltransferase                                                                                      |
| <i>plcB</i>            | Phospholipase C,                                                                                                          |
| <i>plcH</i>            | Hemolytic phospholipase C precursor                                                                                       |
| <i>plcN</i>            | Non-hemolytic phospholipase C precursor                                                                                   |
| <i>pldA</i>            | Phospholipase D                                                                                                           |
| <i>popB</i>            | Type III secretion system hydrophobic translocator, pore                                                                  |
| <i>popD</i>            | Type III secretion system hydrophobic translocator, pore                                                                  |
| <i>popN</i>            | Type III secretion system outer membrane protein                                                                          |
| <i>pqsA</i>            | Pseudomonas quinolone signal response                                                                                     |
| <i>pqsB</i>            | Pseudomonas quinolone signal response                                                                                     |
| <i>pqsC</i>            | Quinolone signal biosynthesis                                                                                             |
| <i>pqsD</i>            | Quinolone signal biosynthesis                                                                                             |
| <i>pqsE</i>            | Pseudomonas quinolone signal response                                                                                     |
| <i>pqsH</i>            | FAD-dependent monooxygenase                                                                                               |
| <i>pqsL</i>            | Putative monooxygenase                                                                                                    |

| <b>Virulence genes</b> | <b>Functions</b>                                  |
|------------------------|---------------------------------------------------|
| <i>pscB</i>            | Type III secretion system protein                 |
| <i>pscC</i>            | Type III secretion system secretin                |
| <i>pscD</i>            | Type III secretion system basal body protein      |
| <i>pscE</i>            | Type III secretion system cochaperone             |
| <i>pscF</i>            | Type III secretion system needle filament protein |
| <i>pscG</i>            | Type III secretion system chaperone               |
| <i>pscH</i>            | Type III secretion system protein                 |
| <i>pscI</i>            | Type III secretion system inner rod protein       |
| <i>pscJ</i>            | Type III secretion system inner MS ring IV        |
| <i>pscK</i>            | Type III secretion system protein                 |
| <i>pscL</i>            | Type III secretion system protein                 |
| <i>pscN</i>            | Type III secretion system ATPase                  |
| <i>pscO</i>            | Type III secretion system protein                 |
| <i>pscP</i>            | Type III secretion system protein                 |
| <i>pscQ</i>            | Type III secretion system protein                 |
| <i>pscR</i>            | Type III secretion system protein                 |
| <i>pscS</i>            | Type III secretion system protein                 |
| <i>pscT</i>            | Type III secretion system protein                 |
| <i>pscU</i>            | Translocation protein in type III secretion       |
| <i>pvdE</i>            | Pyoverdine biosynthesis protein                   |
| <i>rhlI</i>            | Autoinducer synthesis protein                     |
| <i>rhlR</i>            | Transcriptional regulator                         |
| <i>toxA</i>            | Exotoxin A precursor                              |
| <i>tssC1</i>           | Type VI secretion protein                         |
| <i>vgrG3</i>           | Hypothetical protein                              |

\*All the genes are from *P. aeruginosa* PAO1 except for *exoU* for which *P. aeruginosa* UCBPP-PA14 is taken as reference.

**Supplementary Table S5:** Multi-locus sequence typing (MLST) allelic profiles and sequence type of *P. aeruginosa* strains

| <i>P. aeruginosa</i><br>strain | Strain group              | Allelic type |             |             |             |             |             |             | Sequence type<br>(ST) |
|--------------------------------|---------------------------|--------------|-------------|-------------|-------------|-------------|-------------|-------------|-----------------------|
|                                |                           | <i>acsA</i>  | <i>aroE</i> | <i>guaA</i> | <i>mutL</i> | <i>nuoD</i> | <i>ppsA</i> | <i>trpE</i> |                       |
| <b>PA17</b>                    | Eye/Australia             | 16           | 5           | 11          | 1           | 2           | 7           | 2           | New                   |
| <b>PA31</b>                    | Eye/India                 | 13           | 4           | 5           | 5           | 12          | 7           | 15          | 308                   |
| <b>PA32</b>                    | Eye/India                 | 13           | 4           | 5           | 5           | 12          | 7           | 15          | 308                   |
| <b>PA33</b>                    | Eye/India                 | 13           | 4           | 5           | 5           | 12          | 7           | 15          | 308                   |
| <b>PA34</b>                    | Eye/India                 | 32           | 8           | 5           | 3           | 5           | 6           | 26          | 1284                  |
| <b>PA35</b>                    | Eye/India                 | 13           | 4           | 5           | 5           | 12          | 7           | 15          | 308                   |
| <b>PA37</b>                    | Eye/India                 | 13           | 4           | 5           | 5           | 12          | 7           | 15          | 308                   |
| <b>PA40</b>                    | Eye/Australia             | 15           | 5           | 36          | 72          | 1           | 42          | 19          | New                   |
| <b>PA55</b>                    | Cystic fibrosis/Australia | 7            | 5           | 12          | 3           | 4           | 1           | 7           | 549                   |
| <b>PA57</b>                    | Cystic fibrosis/Australia | 111          | 30          | 31          | 26          | 48          | 59          | 32          | New                   |
| <b>PA59</b>                    | Cystic fibrosis/Australia | 11/151       | 84          | 11          | 3           | 4           | 4           | 7           | New (59)              |
| <b>PA64</b>                    | Cystic fibrosis/Australia | 28           | 5           | 11          | 5           | 4           | 4           | 7           | 775                   |
| <b>PA66</b>                    | Cystic fibrosis/Australia | 11/151       | 84          | 11          | 3           | 4           | 4           | 7           | New (59)              |
| <b>PA82</b>                    | Eye/India                 | 32           | 5           | 61          | 13          | 1           | 6           | 54          | 1027                  |
| <b>PA86</b>                    | Cystic fibrosis/Australia | 11/151       | 84          | 11          | 3           | 4           | 4           | 7           | New (59)              |
| <b>PA92</b>                    | Cystic fibrosis/Australia | 28           | 5           | 11          | 5           | 4           | 4           | 7           | 775                   |
| <b>PA100</b>                   | Cystic fibrosis/Australia | 116          | 5           | 6           | 5           | 3           | 12          | 68          | 483                   |
| <b>PA102</b>                   | Cystic fibrosis/Australia | 28           | 24          | 91          | 5           | 4           | 4           | 14          | 1717                  |
| <b>PA149</b>                   | Eye/Australia             | 28           | New         | 12          | 3           | 4           | 12          | 3           | New                   |
| <b>PA157</b>                   | Eye/Australia             | 17           | 5           | 11          | 18          | 4           | 10          | 3           | 386                   |
| <b>PA171</b>                   | Eye/Australia             | 17           | 5           | 11          | 5           | 4           | 4           | 2           | 471                   |
| <b>PA175</b>                   | Eye/Australia             | 13           | 8           | 9           | 3           | 1           | 17          | 15          | 309                   |

(59) new but like PA59
